# Supplementary material
Source: publisher site journal article supplement (https://www.dovepress.com/get_supplementary_file.php?f=474241.docx)
Supplement: Supplementary file 1 [file get_supplementary_file.php]

**Supplementary Figures**

**
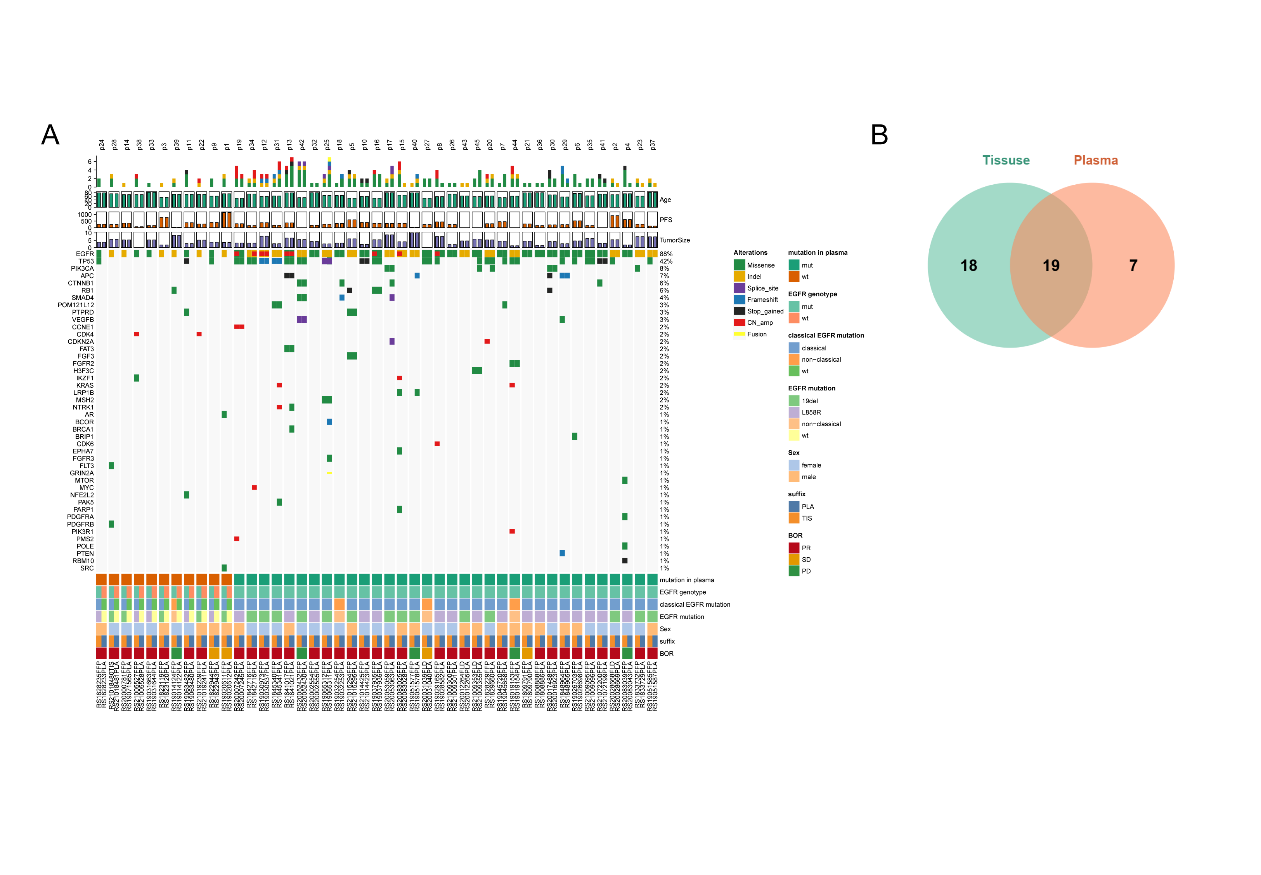
**

**Supplementary Figure 1** Genetic mutation detected in ctDNA. (A) Mutation pattern detected in all ctDNA samples. (B) Comparison of *EGFR* mutations detected in ctDNA and tumor tissues.

**
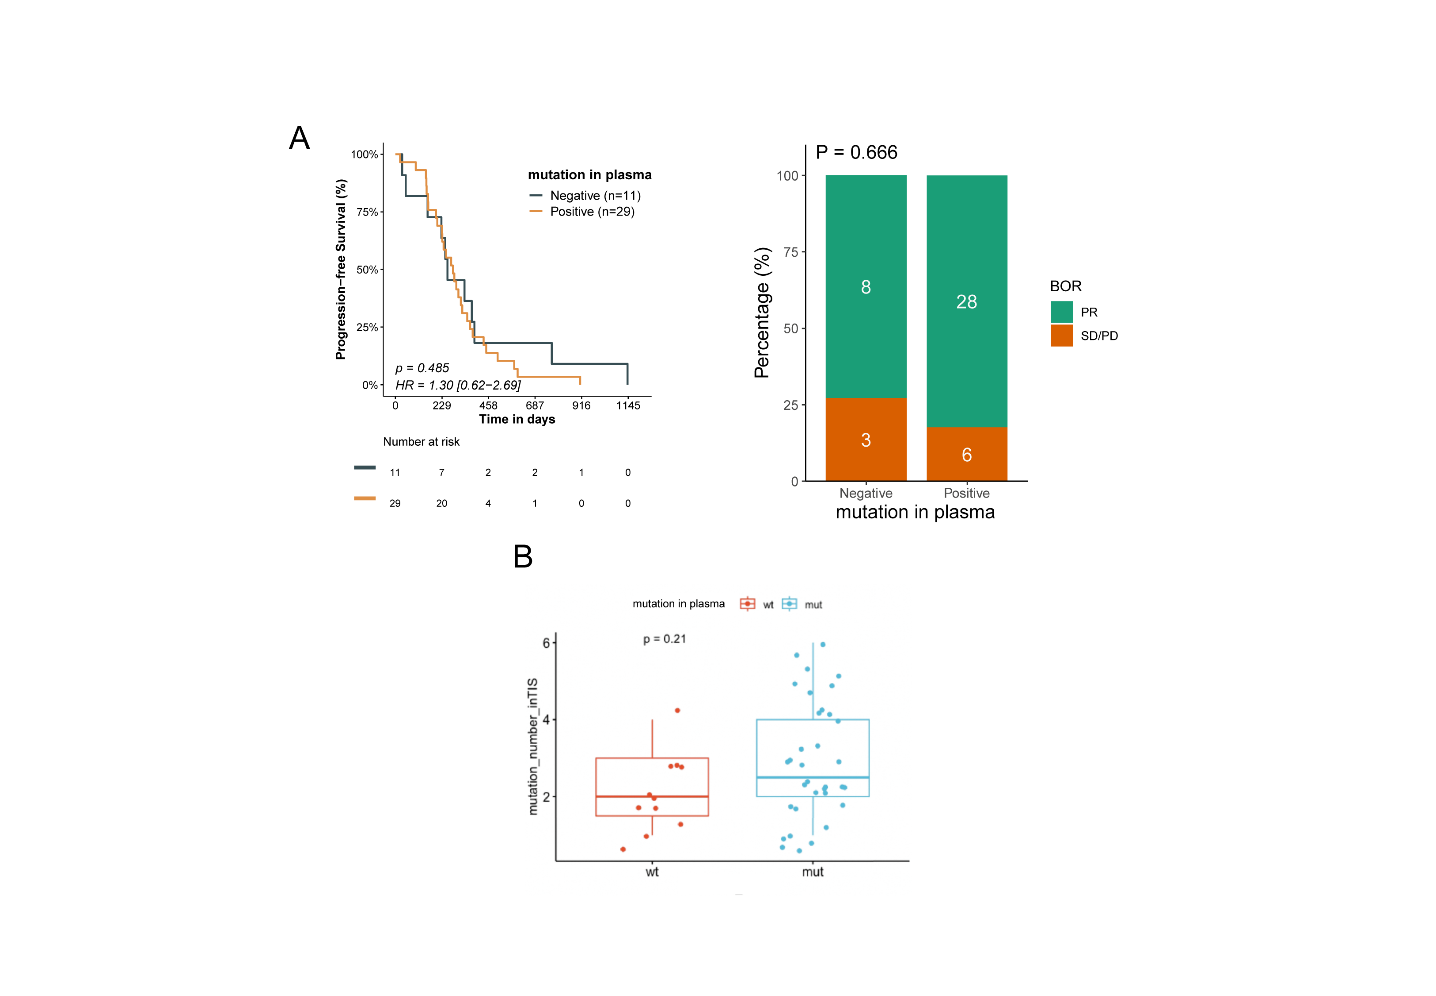
**

**Supplementary Figure 2** ctDNA mutation distribution in patients and its relationship with prognosis. (A) PFS (left) and BOR (right) in patients stratified by their baseline ctDNA. (B) Numbers of detected mutations in the tumor tissues from ctDNA-positive and negative patients.

**
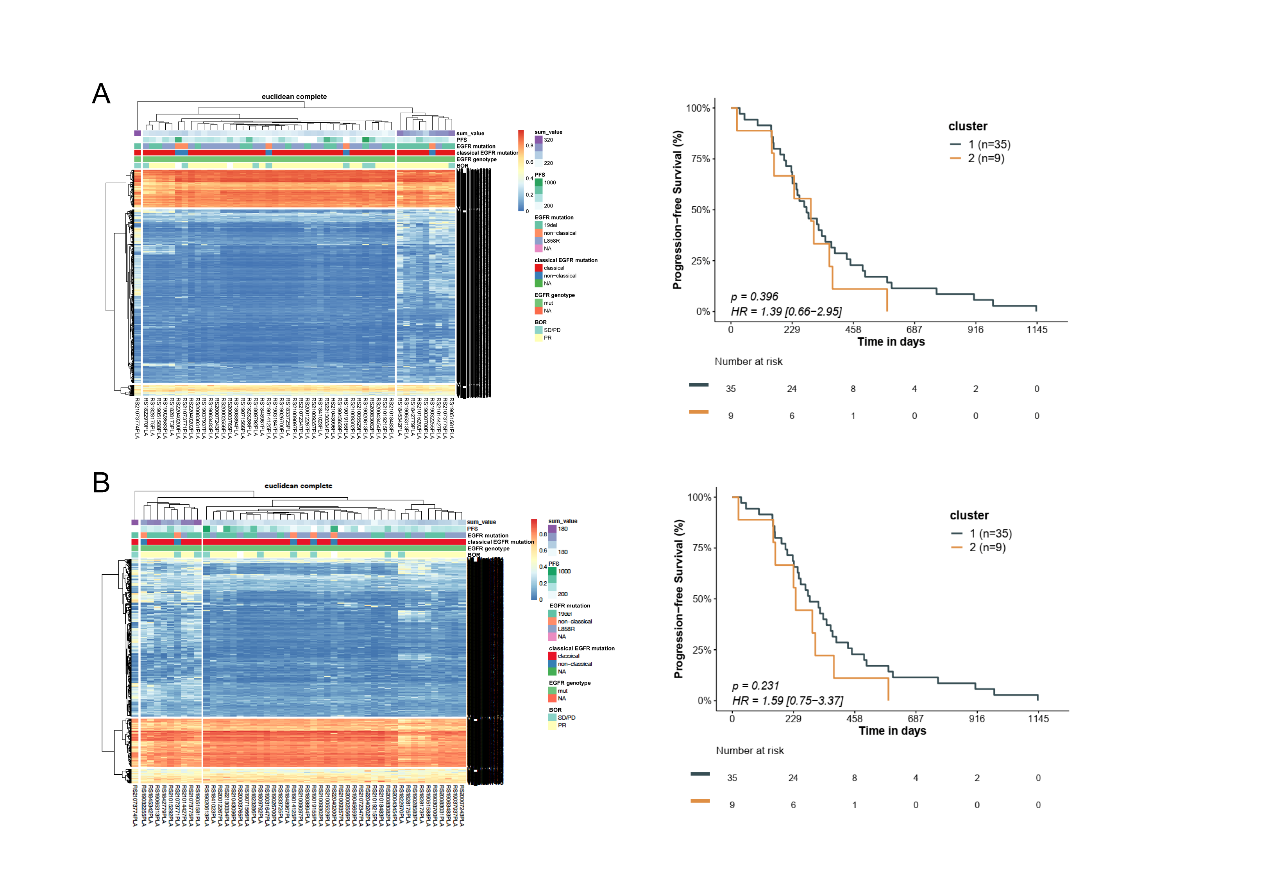
**

**Supplementary Figure 3** Clusters identification based on top 1,000 (A) and top 500 (B) DNA methylation blocks, together with corresponding PFS comparison.


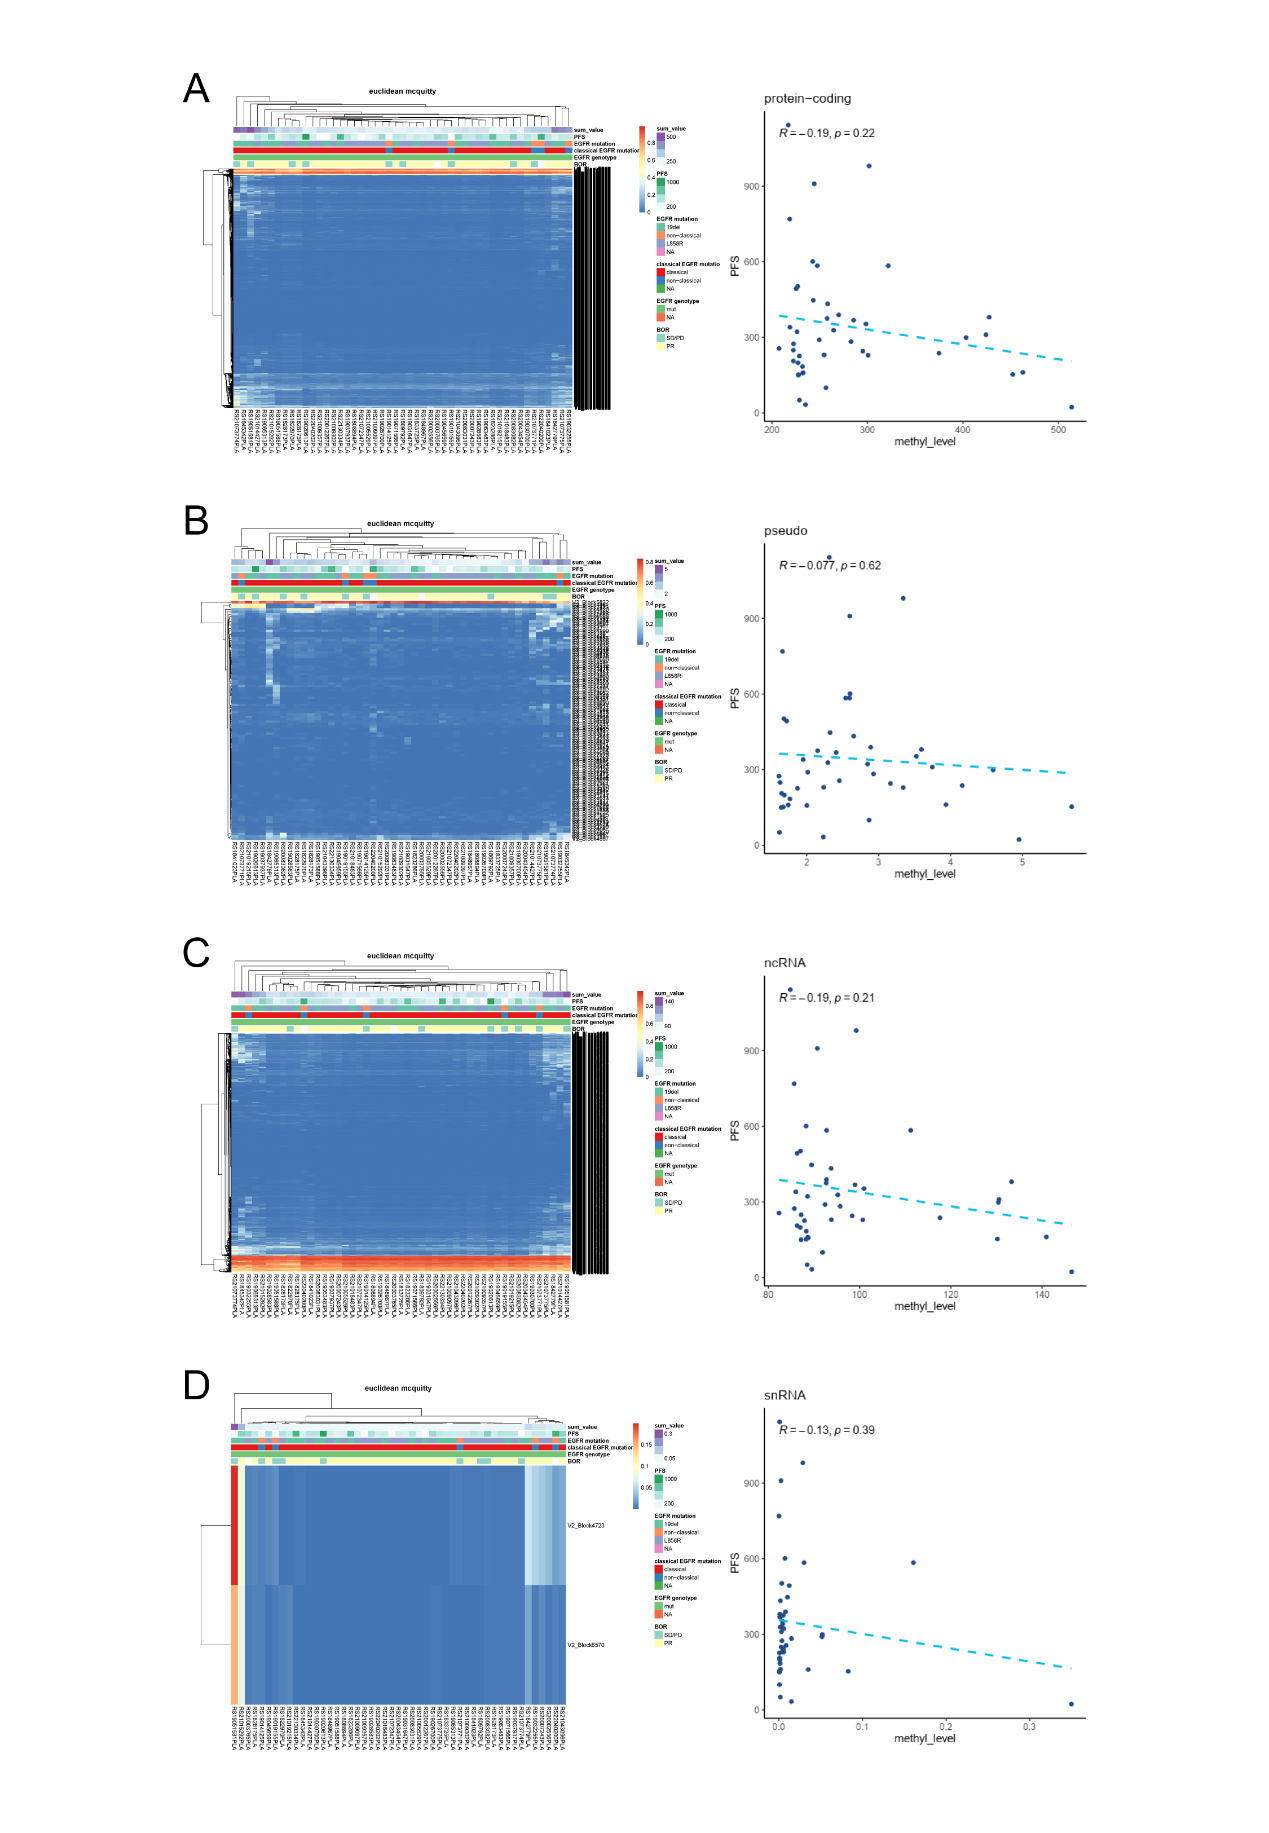


**Supplementary Figure 4** ctDNA methylation levels and the correlation with PFS of different functional gene sets. (A) Protein-coding genes. (B) Pseudo genes. (C) Non-coding RNA. (D) small nuclear RNA.

**
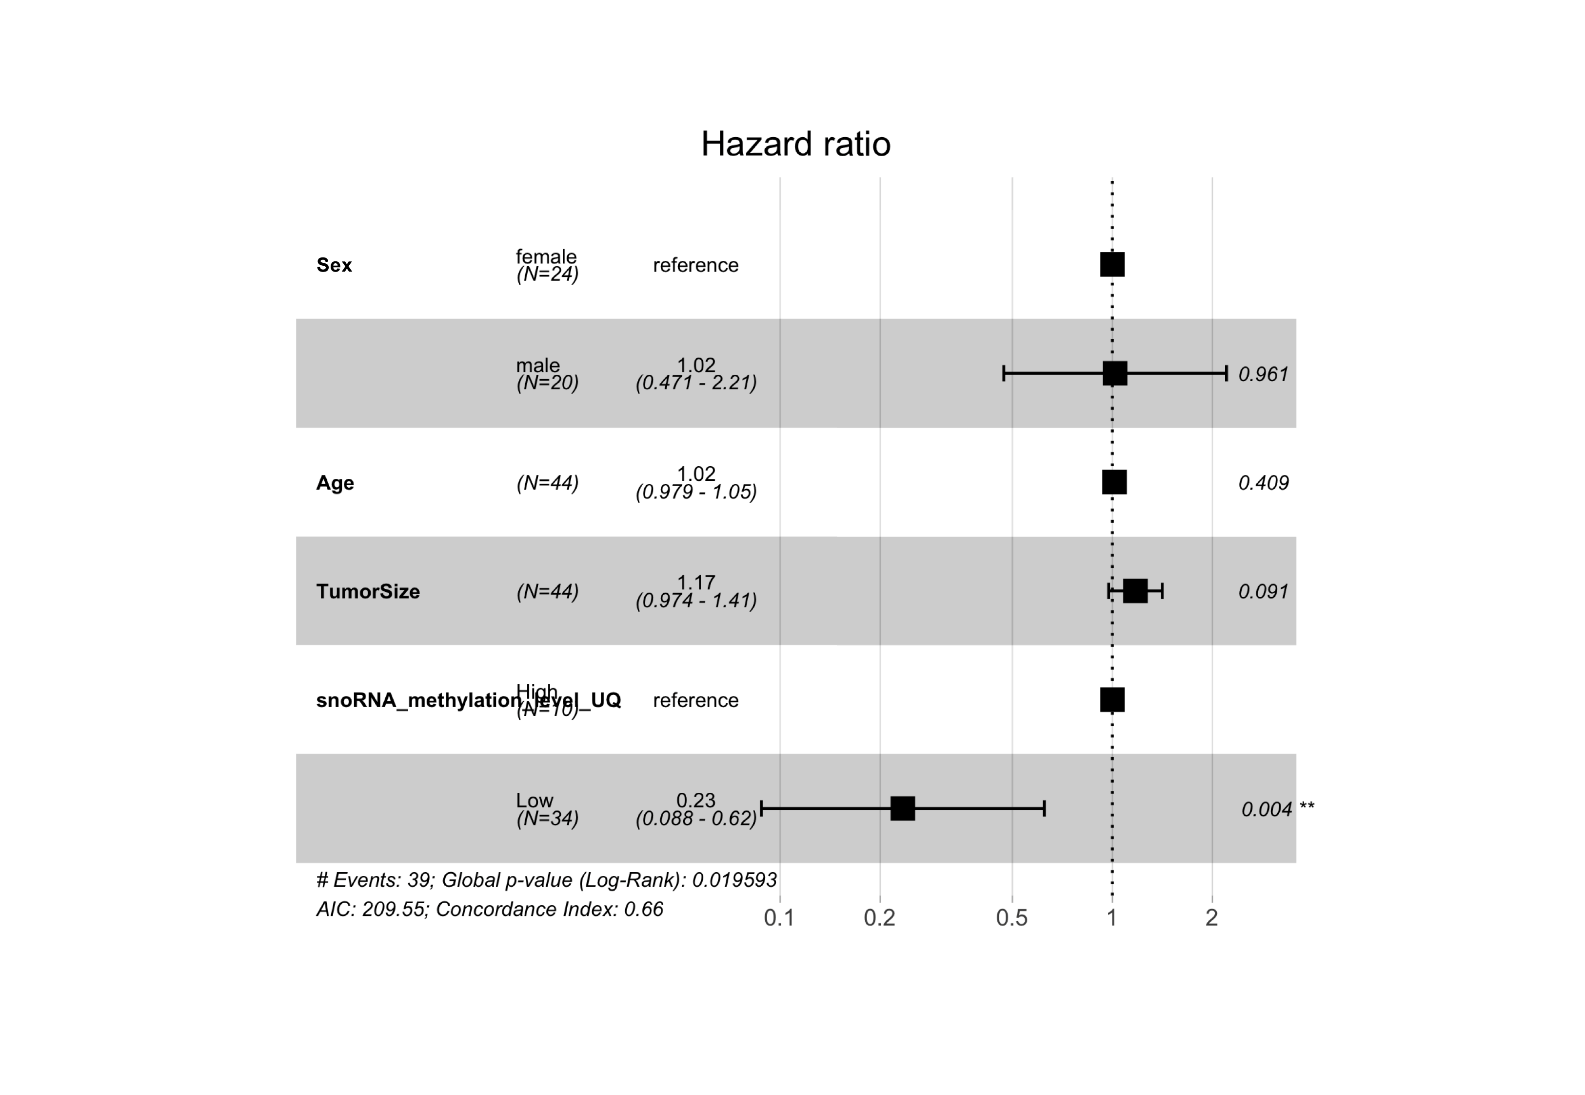
**

**Supplementary Figure 5** Multivariate regression analysis of clinical features and ctDNA methylation levels snoRNA genes.

**
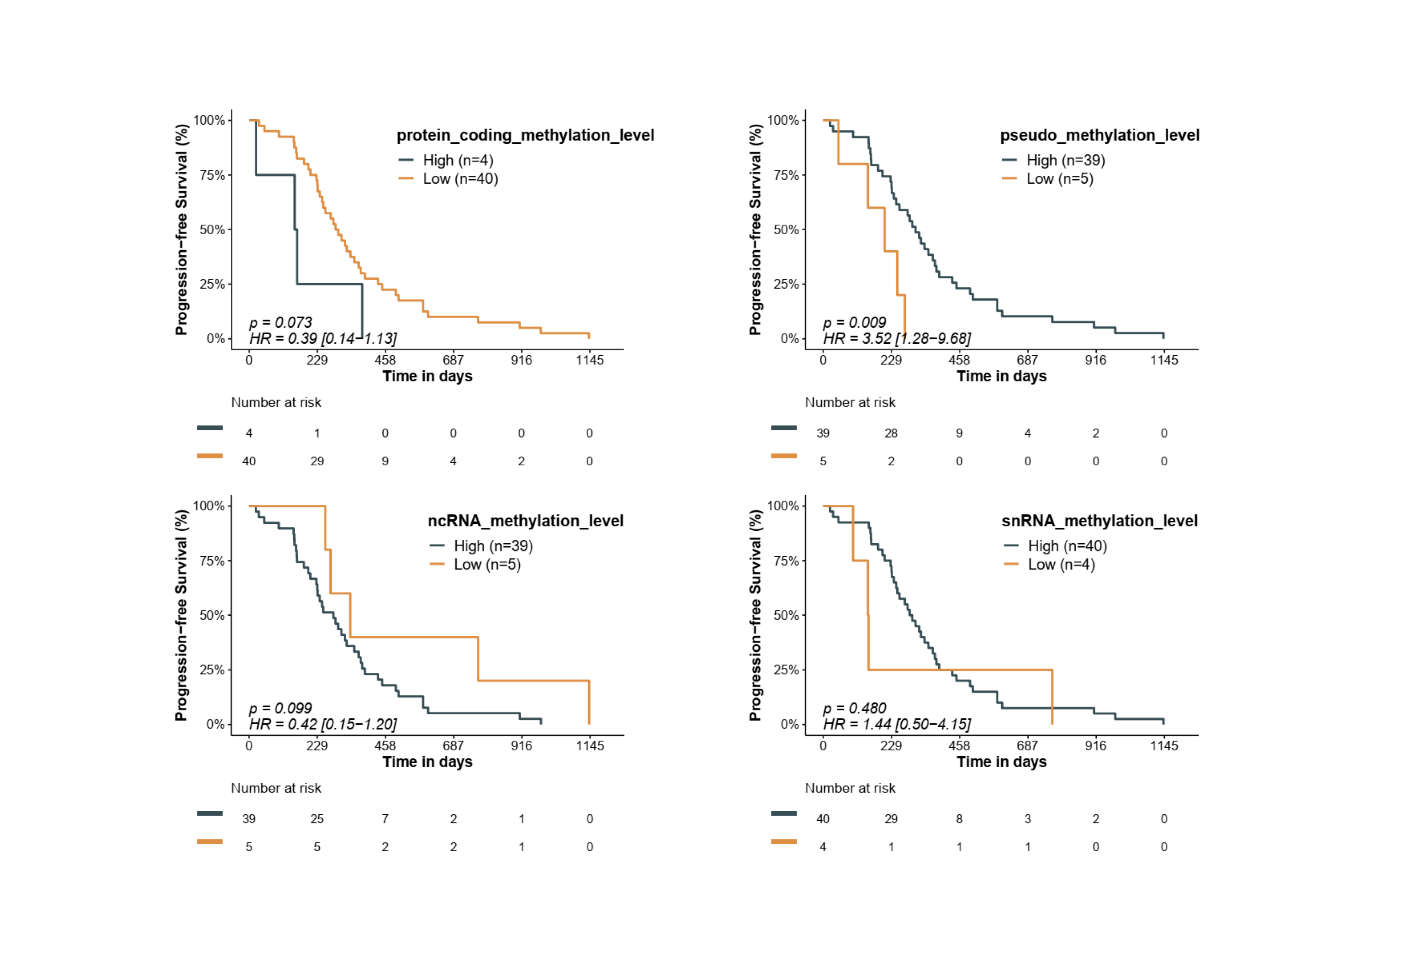
**

**Supplementary Figure 6** Kaplan-Meier plots of PFS in patients stratified with a pre-set cutoff by their methylation level of different functional gene sets.

**Supplementary Tables**

| **Supplementary Table 1: Information of the patients utilized in the analysis.**   | **ID** | **Sex** | **Age** | **Smoking** | **Stage** | **TNM** | **Line1Therapy** | **Line1drug** | **Line1BOR** | **PFS status** | **PFS (d)** | **EGFR mutation type** | | --- | --- | --- | --- | --- | --- | --- | --- | --- | --- | --- | --- | | P001 | male | 75 | No | IV | T4N3M1 | TKI | gefitinib | SD | 1 | 1142 | 19del | | P002 | male | 77 | No | IV |  | TKI | gefitinib |  | 1 | 980 | non-classical | | P003 | female | 69 | No | IV | T4N2Mx | TKI | icotinib | PR | 1 | 909 | 19del | | P004 | male | 55 | No | IV | T4N2M1 | TKI+chemotherapy | gefitinib | PR | 1 | 769 | 19del | | P005 | female | 75 | No | IV | T4N2Mx | TKI | icotinib | PD | 1 | 601 | L858R | | P006 | male | 50 | No | IV | T4N2Mx | TKI | afatinib | PR | 1 | 584 | 19del | | P007 | male | 70 | Yes | IV | T4N2Mx | TKI | icotinib+anlotinib | PR | 1 | 584 | 19del | | P008 | male | 76 | Yes | IV | T2N2M1 | TKI | gefitinib | PR | 1 | 502 | L858R | | P009 | male | 80 | No | IV | T4N3M1 | TKI | gefitinib |  | 1 | 493 | L858R | | P010 | male | 54 | Yes | IV | T4N3M1 | TKI | osimertinib | PR | 1 | 447 | L858R | | P011 | female | 59 | No | IV | T4N3M1 | TKI | afatinib | PR | 1 | 433 | L858R | | P012 | male | 61 | Yes | IV | T3N3M1 | TKI+anti-vascular | gefitinib+bevacizumab | SD | 1 | 389 | L858R | | P013 | female | 60 | No | IV | T4N3M1 | TKI | gefitinib | PR | 1 | 380 | L858R | | P014 | female | 71 | No | IV | T4N3M1 | TKI+chemotherapy |  | PR | 1 | 375 | L858R | | P015 | female | 60 | No | IV | T3N3M1 | TKI | afatinib | PR | 1 | 368 | 19del | | P016 | male | 79 | Yes | IV | T3N3M1 | TKI+anti-vascular | icotinib | PR | 1 | 353 | L858R | | P017 | female | 70 | No | IV | T4N2M1 | TKI | gefitinib | PR | 1 | 340 | 19del | | P018 | male | 67 | No | IV | T4N2Mx | TKI | icotinib | PR | 1 | 328 | 19del | | P019 | female | 50 | No | IV | T4N2M1 | TKI |  | PR | 1 | 322 | L858R | | P020 | female | 80 | No | IV | T4N2Mx | TKI | icotinib | PR | 1 | 310 | 19del | | P021 | female | 65 | No | IV | T4N0M1 | TKI | afatinib | PR | 1 | 299 | non-classical | | P022 | male | 50 | No | IV | T4N3M1 | TKI | icotinib | PR | 1 | 290 | L858R | | P023 | female | 63 | No | IV | T4N2M1 | TKI | gefitinib | PR | 1 | 283 | 19del | | P024 | male | 79 | No | IV | T4N3M1 | TKI | icotinib | SD | 1 | 274 | L858R | | P025 | male | 71 | No | IV | T4N2Mx | TKI | osimertinib | PR | 1 | 256 | 19del | | P026 | female | 61 | No | IV | TxN2M1 | TKI | icotinib | PR | 1 | 249 | 19del | | P027 | male | 79 | Yes | IV | T4N3M1 | TKI | icotinib | PR | 1 | 245 | L858R | | P028 | female | 65 | No | IV | T1N3M1 | TKI | gefitinib | PR | 1 | 237 | 19del | | P029 | female | 72 | No | IV | T3N0M1 | TKI | gefitinib | PR | 1 | 230 | L858R | | P030 | female | 50 | Yes | IV | T4N2Mx | TKI | gefitinib | SD | 1 | 229 | non-classical | | P031 | female | 75 | No | IV | T4N3M1 | TKI | icotinib | PR | 1 | 226 | 19del | | P032 | male | 57 | No | IV | T4N0M1 | TKI | gefitinib | PR | 1 | 206 | L858R | | P033 | female | 68 | Yes | IV | T4N3M1 | TKI+ICI | gefitinib | PR | 1 | 199 | L858R | | P034 | female | 67 | No | IV | T4N2Mx | TKI | icotinib | PR | 1 | 184 | L858R | | P035 | female | 63 | Yes | IV | T4N3M1 | TKI | icotinib | PR | 1 | 161 | 19del | | P036 | female | 80 | No | IV | T3N3M1 | TKI | gefitinib | PR | 1 | 160 | L858R | | P037 | female | 82 | No | IV | T3N0M1 | TKI | gefitinib | PR | 1 | 158 | L858R | | P038 | female | 74 | No | IV | T3N1M1 | TKI | icotinib | PR | 1 | 153 | 19del | | P039 | female | 64 | No | IV | T4N2Mx | TKI | gefitinib | PR | 1 | 152 | L858R | | P040 | male | 80 | Yes | IV | T4N3M1 | TKI | icotinib | PR | 1 | 150 | L858R | | P041 | male | 82 | Yes | IV | T4N3M1 | TKI | icotinib | PR | 1 | 100 | 19del | | P042 | female | 70 | No | IV | T4N3M1 | TKI+chemotherapy | gefitinib | PR | 1 | 51 | L858R | | P043 | female | 71 | No | III | T4N3Mx | TKI | gefitinib | PD | 1 | 33 | non-classical | | P044 | male | 79 | Yes | IV | T4N2M1 | TKI | gefitinib | PD | 1 | 23 | 19del | | P045 | female | 72 | No | IV | T4N1M1 | TKI | icotinib | PR |  |  | L858R | | P046 | female | 54 | No | IV | T4N3M1 | TKI | almonertinib | PD |  |  | 19del | | P047 | male | 63 | No | IV | T4N2M1 | TKI |  | PR |  |  | 19del | | P048 | male | 61 | Yes | IV | T4N3M1 | TKI | poziotinib | PD |  |  | non-classical | | P049 | male | 59 | Yes | IV | T4N2Mx | TKI | icotinib | PR |  |  | L858R |   **Supplementary Table 2: Classification of genes in the methylation sequencing panel.** | |
| --- | --- | --- | --- | --- | --- | --- | --- | --- | --- | --- | --- | --- | --- | --- | --- | --- | --- | --- | --- | --- | --- | --- | --- | --- | --- | --- | --- | --- | --- | --- | --- | --- | --- | --- | --- | --- | --- | --- | --- | --- | --- | --- | --- | --- | --- | --- | --- | --- | --- | --- | --- | --- | --- | --- | --- | --- | --- | --- | --- | --- | --- | --- | --- | --- | --- | --- | --- | --- | --- | --- | --- | --- | --- | --- | --- | --- | --- | --- | --- | --- | --- | --- | --- | --- | --- | --- | --- | --- | --- | --- | --- | --- | --- | --- | --- | --- | --- | --- | --- | --- | --- | --- | --- | --- | --- | --- | --- | --- | --- | --- | --- | --- | --- | --- | --- | --- | --- | --- | --- | --- | --- | --- | --- | --- | --- | --- | --- | --- | --- | --- | --- | --- | --- | --- | --- | --- | --- | --- | --- | --- | --- | --- | --- | --- | --- | --- | --- | --- | --- | --- | --- | --- | --- | --- | --- | --- | --- | --- | --- | --- | --- | --- | --- | --- | --- | --- | --- | --- | --- | --- | --- | --- | --- | --- | --- | --- | --- | --- | --- | --- | --- | --- | --- | --- | --- | --- | --- | --- | --- | --- | --- | --- | --- | --- | --- | --- | --- | --- | --- | --- | --- | --- | --- | --- | --- | --- | --- | --- | --- | --- | --- | --- | --- | --- | --- | --- | --- | --- | --- | --- | --- | --- | --- | --- | --- | --- | --- | --- | --- | --- | --- | --- | --- | --- | --- | --- | --- | --- | --- | --- | --- | --- | --- | --- | --- | --- | --- | --- | --- | --- | --- | --- | --- | --- | --- | --- | --- | --- | --- | --- | --- | --- | --- | --- | --- | --- | --- | --- | --- | --- | --- | --- | --- | --- | --- | --- | --- | --- | --- | --- | --- | --- | --- | --- | --- | --- | --- | --- | --- | --- | --- | --- | --- | --- | --- | --- | --- | --- | --- | --- | --- | --- | --- | --- | --- | --- | --- | --- | --- | --- | --- | --- | --- | --- | --- | --- | --- | --- | --- | --- | --- | --- | --- | --- | --- | --- | --- | --- | --- | --- | --- | --- | --- | --- | --- | --- | --- | --- | --- | --- | --- | --- | --- | --- | --- | --- | --- | --- | --- | --- | --- | --- | --- | --- | --- | --- | --- | --- | --- | --- | --- | --- | --- | --- | --- | --- | --- | --- | --- | --- | --- | --- | --- | --- | --- | --- | --- | --- | --- | --- | --- | --- | --- | --- | --- | --- | --- | --- | --- | --- | --- | --- | --- | --- | --- | --- | --- | --- | --- | --- | --- | --- | --- | --- | --- | --- | --- | --- | --- | --- | --- | --- | --- | --- | --- | --- | --- | --- | --- | --- | --- | --- | --- | --- | --- | --- | --- | --- | --- | --- | --- | --- | --- | --- | --- | --- | --- | --- | --- | --- | --- | --- | --- | --- | --- | --- | --- | --- | --- | --- | --- | --- | --- | --- | --- | --- | --- | --- | --- | --- | --- | --- | --- | --- | --- | --- | --- | --- | --- | --- | --- | --- | --- | --- | --- | --- | --- | --- | --- | --- | --- | --- | --- | --- | --- | --- | --- | --- | --- | --- | --- | --- | --- | --- | --- | --- | --- | --- | --- | --- | --- | --- | --- | --- | --- | --- | --- | --- | --- | --- | --- | --- | --- | --- | --- | --- | --- | --- | --- | --- | --- | --- | --- | --- | --- | --- | --- | --- | --- | --- | --- | --- | --- | --- | --- | --- | --- | --- | --- | --- | --- | --- | --- | --- | --- | --- | --- | --- | --- | --- | --- | --- | --- | --- | --- | --- | --- | --- | --- | --- | --- | --- | --- | --- | --- | --- | --- | --- | --- | --- | --- | --- | --- | --- | --- | --- | --- | --- | --- | --- | --- | --- | --- | --- | --- | --- | --- | --- | --- | --- | --- | --- | --- | --- | --- | --- | --- | --- | --- | --- | --- |
| Gene type | Number |
| protein-coding | 2223 |
| ncRNA | 434 |
| pseudo gene | 39 |
| snoRNA | 4 |
| snRNA | 1 |
